# Supplementary material
Source: PubMed Central journal article supplement (PMC4947429)
Supplement: NIHMS792973-supplement-401_2016_1576_MOESM1_ESM.pdf [file NIHMS792973-supplement-401_2016_1576_MOESM1_ESM.pdf]

Electronic Supplementary Material

**Gene expression, methylation and neuropathology correlations at progressive supranuclear palsy risk loci.**

Mariet Allen PhD<sup>1</sup>, Jeremy D. Burgess BS<sup>1</sup>, Travis Ballard BS<sup>1</sup>, Daniel Serie BS<sup>2</sup>, Xue Wang PhD<sup>2</sup>, Curtis S. Younkin BS<sup>2</sup>, Zhifu Sun MD<sup>3</sup>, Naomi Kouri PhD<sup>1</sup>, Saurabh Baheti MS<sup>3</sup>, Chen Wang PhD<sup>3</sup>, Minerva M. Carrasquillo PhD<sup>1</sup>, Thuy Nguyen BS<sup>1</sup>, Sarah Lincoln BS<sup>1</sup>, Kimberly Malphrus BS<sup>1</sup>, Melissa Murray PhD<sup>1</sup>, Todd Golde<sup>4</sup>, Nathan D. Price<sup>5</sup>, Steven G. Younkin MD, PhD<sup>1</sup>, Gerard D. Schellenberg PhD<sup>6</sup>, Yan Asmann PhD<sup>2</sup>, Tamas Ordog MD<sup>7</sup>, Julia Crook PhD<sup>2</sup>, Dennis Dickson MD<sup>1</sup>, Nilüfer Ertekin-Taner MD, PhD<sup>1,8\*</sup>

1. Mayo Clinic, Department of Neuroscience, Florida, USA, 32224
2. Mayo Clinic, Department of Health Sciences Research, Florida, USA, 32224
3. Mayo Clinic, Department of Health Sciences Research, Minnesota, USA, 55905
4. Center for Translational Research in Neurodegenerative Disease, McKnight Brain Institute, University of Florida, Department of Neuroscience, Gainesville, FL 32610, USA.
5. Institute for Systems Biology, 401 Terry Avenue N, Seattle, WA 98109, USA.
6. University of Pennsylvania, Perelman School of Medicine, Philadelphia, PA, 19104
7. Mayo Clinic, Department of Physiology and Biomedical Engineering and Center for Individualized Medicine, Rochester, Minnesota, USA, 55905
8. Mayo Clinic, Department of Neurology, Florida, USA, 32224

\*Corresponding author: E-mail: [taner.nilufer@mayo.edu](mailto:taner.nilufer@mayo.edu), Phone: 904-953-7103, FAX:904-953-7370

Contents:

Online Resource Methods

Online Resource Tables 1-5

Online Resource Figs 1 - 3

**Online Resource: Methods****RNA sequencing (RNAseq)**

Temporal cortex gene expression measures collected using RNA sequencing were available for a subset of the subjects in the previously described expression cohorts A and B (Cohort A, N= 78; Cohort B, N= 85). This available data was used for validation of the expression measures generated with the WG-DASL gene expression array. Total RNA for RNAseq was extracted from frozen brain tissue using either Trizol® reagent and cleaned using Qiagen RNeasy columns with DNase treatment (Cohort A) or the Ambion RNAqueous kit (Cohort B). RNA integrity number (RIN) was measured using an Agilent Technologies 2100 Bioanalyzer. Samples were randomized prior to transfer to the Mayo Clinic Medical Genome Facility Gene Expression and Sequencing Cores for library preparation and sequencing. The TruSeq RNA Sample Prep Kit (Illumina, San Diego, CA) was used for library preparation. The library concentration and size distribution was determined on an Agilent Bioanalyzer DNA 1000 chip. Sequencing was performed on the Illumina HiSeq2000 using either 101 base-pair (bp) (Cohort A) or 50 bp (Cohort B) paired end sequencing, with triplicate multiplexing of barcoded samples (3 samples per flowcell lane). Base-calling was performed using Illumina's RTA 1.18.61 or RTA 1.17.21.3 (Cohort A) or v.1.12.4.2 (Cohort B). FASTQ sequence reads were aligned to the human reference genome using TopHat [5] and Bowtie [3] and either Subread 1.4.4 (Cohort A) or HTSeq (Cohort B) was used for gene counting [1]. FastQC was used for quality control (QC) of raw sequence reads, and RSeQC was used for QC of mapped reads. Raw read counts were normalized using Conditional Quantile Normalization (CQN) via the Bioconductor package; accounting for sequencing depth, gene length, and GC content. Normalized read counts were used as the gene expression phenotype for generating residuals.

### Comparison with other brain gene expression data

We compared the significant *cis*-eSNPs from Tables 3 in our study to three other publically available brain eQTL datasets.

1. We have previously collected gene expression measures from temporal cortex tissue of 202 AD subjects, using the Illumina WG-DASL microarray [7]. Expression measures were available for *MOBP* (ILMN\_2298464) and *LRRC37A4* (ILMN\_2393693) and were tested for association with rs1768208 and rs8070723 respectively. Genotype data were available for 198 of these subjects. eQTL statistical methods used were as described for PSP expression cohort B in Methods for Main Text.

2. Ramasamy et al. [4] generated eQTL data using exon-specific RNA expression levels quantified by Affymetrix Human Exon 1.0 ST arrays and DNA genotypes obtained from Illumina Omni1-quad and Immunochip arrays followed by imputation using the 1000 Genomes Project (March 2012 release). Braineac website (<http://www.braineac.org/>) had TCX eQTL results only for rs1768208/*MOBP* (t2618407 = transcript ID). The beta coefficient for the *cis*-eSNP associations are not available at the Braineac website, therefore the direction of association with the SNP minor allele was based on the boxplots from this site.

3. Zhang et al. [6] utilized custom gene expression arrays manufactured by Agilent Technologies and two genotyping platforms, the IlluminaHumanHap650Y array and a custom Perlegen 300K array, for their eQTL analyses. The *cis*-eQTL results in their published supplementary tables for the dorsolateral prefrontal cortex (PFC), cerebellar (CER) and Visual Cortex (VC) were screened for the significant associations in our study from Table 3. Results were available for only

rs8070723 and only for VC. Zhang *et al* assessed subjects with a pathological diagnosis of AD, Huntington's disease and healthy controls. The group of subjects for which results were available is indicated in the Online Resource Table 4. The direction of the association (beta) is not available in this dataset and so only the p-value is reported.

## Supplemental Tables

**Online Resource Table 1. Genes and probes in cis with PSP index SNPs assessed in this study.**

| Index SNP  | Chr   | Gene                               | Probe(s)                                                  | # Tests |
|------------|-------|------------------------------------|-----------------------------------------------------------|---------|
| rs8070723  | 17q21 | <i>PLEKHM1</i>                     | ILMN_1709549                                              | 1       |
|            |       | <i>LRRC37A4</i>                    | ILMN_2393693                                              | 1       |
|            |       | <i>CRHR1</i>                       | ILMN_1732426; ILMN_1753706                                | 2       |
|            |       | <i>MAPT</i>                        | ILMN_1800049; ILMN_2310814                                | 2       |
|            |       | <i>STH</i>                         | ILMN_1665311                                              | 1       |
|            |       | <i>KANSL1</i>                      | ILMN_2200636                                              | 1       |
|            |       | <i>ARL17A</i>                      | ILMN_1698680                                              | 1       |
|            |       | <i>ARL17B</i>                      | ILMN_3231502; ILMN_3231952                                | 2       |
| rs242557   | 17q21 | <i>PLEKHM1</i>                     | ILMN_1709549                                              | 1       |
|            |       | <i>LRRC37A4</i>                    | ILMN_2393693                                              | 1       |
|            |       | <i>CRHR1</i>                       | ILMN_1732426; ILMN_1753706                                | 2       |
|            |       | <i>MAPT</i>                        | ILMN_1800049; ILMN_2310814                                | 2       |
|            |       | <i>STH</i>                         | ILMN_1665311                                              | 1       |
|            |       | <i>KANSL1</i>                      | ILMN_2200636                                              | 1       |
|            |       | <i>ARL17A</i>                      | ILMN_1698680                                              | 1       |
|            |       | <i>ARL17B</i>                      | ILMN_3231502; ILMN_3231952                                | 2       |
| rs1411478  | 1q25  | <i>IER5</i>                        | ILMN_1721833                                              | 1       |
|            |       | <i>MR1</i>                         | ILMN_2167416                                              | 1       |
|            |       | <i>STX6</i>                        | ILMN_1777915; ILMN_2157951                                | 2       |
| rs7571971  | 2p11  | <i>EIF2AK3</i>                     | ILMN_1724984                                              | 1       |
|            |       | <i>RPIA</i>                        | ILMN_1714809                                              | 1       |
| rs1768208  | 3p22  | <i>MOBP</i>                        | ILMN_1750271; ILMN_1768947;<br>ILMN_2298464; ILMN_2414962 | 4       |
|            |       | <i>RPSA</i>                        | ILMN_1664910; ILMN_2411723                                | 2       |
|            |       | <i>SLC25A38</i>                    | ILMN_1781231                                              | 1       |
|            |       | <i>SNORA6</i>                      | ILMN_3245365                                              | 1       |
| rs2142991  | 10q11 | <i>BMS1</i>                        | ILMN_1772713                                              | 1       |
| rs11568563 | 12p12 | <i>IAPP</i>                        | ILMN_1679527                                              | 1       |
|            |       | <i>SLCO1A2</i>                     | ILMN_1656097; ILMN_1720727;<br>ILMN_1806979               | 3       |
| rs6687758  | 1q41  | <i>No Genes with probes in cis</i> |                                                           | 0       |
| TOTAL      |       |                                    |                                                           | 41      |

**Online Resource Table 2. Sequence Alignment for WG-DASL Probes with Significant eQTL Results.** BLAT results (UCSC genome browser, hg19) are shown where WG-DASL 50 bp probes aligned with a 100% match to RefSeq transcripts annotated to autosomal chromosomes.

| Probe        | Sequence                                              | Probe Targets |        |          |          |                |                          |
|--------------|-------------------------------------------------------|---------------|--------|----------|----------|----------------|--------------------------|
|              |                                                       | Chr           | Strand | Start    | End      | Gene           | RefSeq Transcript (Exon) |
| ILMN_2298464 | GATCTTGGCCAGGTGCCTTCTGCTCAAATATCGTCTCAGAGGTGCTTCCC    | 3             | +      | 39557207 | 39557256 | <i>MOBP</i>    | NM_182935.3 (Exon 4)     |
| ILMN_2393693 | AGCAGCCCCGTGTGTATGCTGGTGCAGGTTCTAAGCAAAGTGAGCTGCCC    | 17            | -      | 43584483 | 43584532 | <i>LRR37A4</i> | NR_002940.2 (Exon 6)     |
| ILMN_3231952 | CAAGAAATTATGCGGGGTCCTGCTGCTCAAATATCGTCTCAGAGGTGCTTCCC | 17            | -      | 44376951 | 44377000 | <i>ARL17A</i>  | NM_016632.2 (Exon 4)     |
| ILMN_3231952 | CAAGAAATTATGCGGGGTCCTGCTGCTCAAATATCGTCTCAGAGGTGCTTCCC | 17            | -      | 44376951 | 44377000 | <i>ARL17B</i>  | NM_001103154.1 (Exon 4)  |
| ILMN_1698680 | TCTGATTGGCCCCTCACACCTCACTCCTAGATTTTGCTAGACCTTCT       | 17            | -      | 44594196 | 44594245 | <i>ARL17A</i>  | NM_016632.2 (Exon 5)     |

**Online Resource Table 3. Spearman rank correlations for gene expression measures collected using WG-DASL microarray and RNA sequencing methods.** Cohort A underwent gene expression measurements with WG-DASL HT arrays which had probes for *MOBP*, *ARL17A*, *ARL17B* and *LRRC37A4*. Of these genes, only *MOBP* had both RNAseq measures and a probe on the older version of the reference genome and WG-DASL microarrays with which Cohort B was measured respectively. *MOBP* results for Cohorts A and B are shown individually as well as combined. RNAseq gene measurements correspond to the sum of all exons. RNAseq exon measurements correspond to the specific exon to which the WG-DASL probe binds. Online figures depicting each of the correlations are provided in the electronic supplemental materials as noted in the last column.

| Cohort | Gene            | DASL probe   | Start    | End      | RNAseq | Start    | End      | Spearman rank |           | Figure |
|--------|-----------------|--------------|----------|----------|--------|----------|----------|---------------|-----------|--------|
|        |                 |              |          |          |        |          |          | Corr.Coef     | P-value   |        |
| A      | <i>MOBP</i>     | ILMN_2298464 | 39557207 | 39557256 | Gene   | 39508689 | 39570970 | 0.194         | 8.86E-02  | ESM3.a |
| B      | <i>MOBP</i>     | ILMN_2298464 | 39557207 | 39557256 | Gene   | 39509070 | 39567857 | 0.642         | <2.20E-16 | ESM3.b |
| A+B    | <i>MOBP</i>     | ILMN_2298464 | 39557207 | 39557256 | Gene   | NA       | NA       | 0.433         | 1.15E-08  | ESM3.c |
| A      | <i>ARL17A</i>   | ILMN_1698680 | 44594196 | 44594245 | Gene   | 44594068 | 44657088 | 0.400         | 3.22E-04  | ESM3.d |
| A      | <i>ARL17B</i>   | ILMN_3231952 | 44376951 | 44377000 | Gene   | 44352150 | 44439130 | 0.505         | 3.32E-06  | ESM3.e |
| A      | <i>LRRC37A4</i> | ILMN_2393693 | 43584483 | 43584532 | Gene   | 43578685 | 43627701 | 0.356         | 1.47E-03  | ESM3.f |
| A      | <i>MOBP</i>     | ILMN_2298464 | 39557207 | 39557256 | Exon   | 39554874 | 39557494 | 0.196         | 8.58E-02  | ESM4.a |
| B      | <i>MOBP</i>     | ILMN_2298464 | 39557207 | 39557256 | Exon   | 39554874 | 39557494 | 0.803         | <2.20E-16 | ESM4.b |
| A+B    | <i>MOBP</i>     | ILMN_2298464 | 39557207 | 39557256 | Exon   | NA       | NA       | 0.497         | 8.64E-12  | ESM4.c |
| A      | <i>ARL17A</i>   | ILMN_1698680 | 44594196 | 44594245 | Exon   | 44594068 | 44594379 | 0.665         | <2.20E-06 | ESM4.d |
| A      | <i>ARL17B</i>   | ILMN_3231952 | 44376951 | 44377000 | Exon   | 44376892 | 44377031 | 0.516         | 1.92E-06  | ESM4.e |
| A      | <i>LRRC37A4</i> | ILMN_2393693 | 43584483 | 43584532 | Exon   | 43584107 | 43585905 | 0.140         | 2.21E-01  | ESM4.f |

**Online Resource Table 4. Comparison of PSP temporal cortex eQTL data with results in other datasets.** Comparative data was available for three of the results shown. a. eQTL results in PSP brains from Cohort A in this study. b. Our published Zou et al. study results from AD temporal cortex. c. Braineac eQTL beta values were not available from the website, therefore the direction of association with the SNP minor allele is shown: + indicates association of minor allele with higher gene levels based on boxplots from the website. Results are shown for brains of control subjects. d. Results from Zhang et al. study are for the combined subjects (All=376 LOAD, 194 Huntington's disease, 173 nondemented controls) or nondemented controls only as indicated. TCX=temporal cortex, VC=visual cortex. NA=Not available.

| SNP       | Tested Allele | Probe        | Chr | Gene Symbol     | Cohort A <sup>a</sup> (TCX) |       |          | Zou et al <sup>b</sup> (TCX) |       |          | Braineac Ramasamy et al <sup>c</sup> (TCX) |      |         | Zhang et al <sup>d</sup> (VC) |          |
|-----------|---------------|--------------|-----|-----------------|-----------------------------|-------|----------|------------------------------|-------|----------|--------------------------------------------|------|---------|-------------------------------|----------|
|           |               |              |     |                 | N                           | Beta  | p-value  | N                            | Beta  | p-value  | Transcript ID                              | Beta | p-value | Subect group                  | p-value  |
| rs1768208 | T             | ILMN_2298464 | 3   | <i>MOBP</i>     | 175                         | 0.30  | 1.68E-02 | 198                          | 0.31  | 1.38E-03 | t2618407                                   | (+)  | 0.02    |                               | NA       |
| rs8070723 | G             | ILMN_2393693 | 17  | <i>LRRC37A4</i> | 175                         | -0.45 | 1.60E-04 | 198                          | -0.53 | 1.48E-22 |                                            | NA   |         | Controls                      | 1.25E-10 |
| rs8070723 | G             | ILMN_3231952 | 17  | <i>ARL17B</i>   | 175                         | -0.35 | 6.43E-03 |                              |       | NA       |                                            | NA   |         | All                           | 8.55E-10 |



**Online Resource Table 5. Chromosome 17 inversion region CpGs tested for association with rs8070723 and rs242557:** The results for this table are deposited as a separate Excel file (ESM5\_OnlineTable5.xlsx) due to their size. Chromosomal breakpoints were defined as described in Itsara *et al*[2] ranging from 43.4Mbp to 44.8Mbp, according to build hg19. A total of 1,373 Unique CpGs were captured across the locus on both strands. Excluding CpGs that were methylated in 100% or 0% of all subjects, 1,108 could be tested. The table has >1,373 rows, because some CpGs fall within the gene annotation of more than 1 gene/transcript and therefore are listed 2-3 times. Results are annotated with any known SNPs (dbSNP 135) at CpG positions, the gene in which the CpG resides, the specific transcript and distance to transcript start site (Tss) if relevant. Additionally whether the CpG is in a known exon or a CpG island is indicated (1= yes, 0 = no).

**Supplemental Figure Legends:**

**Online Resource Fig 1. Histograms of RIN values for samples in a) cohort A and b) cohort B.**

**Online Resource Fig 2. Correlation plots of WG-DASL vs. RNAseq expression levels for gene counts.** Linear regression plots of gene expression residuals obtained after adjusting for appropriate covariates as described in methods were plotted.

a) *MOBP* cohort A; b) *MOBP* cohort B; c) *MOBP* cohorts A+B; d) *LRRC37A4P* (a.k.a *LRRC37A4*) cohort A; e) *ARL17A* cohort A; f) *ARL17B* cohort A.

**Online Resource Fig 3. Correlation plots of WG-DASL vs RNAseq expression levels for counts of exons corresponding to WG-DASL binding sites.** Other information is as in Online Resource Fig. 2.

## References

- 1 Anders S, Pyl PT, Huber W (2015) HTSeq--a Python framework to work with high-throughput sequencing data. *Bioinformatics* 31: 166-169 10.1093/bioinformatics/btu638
- 2 Itsara A, Vissers LE, Steinberg KM, Meyer KJ, Zody MC, Koolen DA et al (2012) Resolving the breakpoints of the 17q21.31 microdeletion syndrome with next-generation sequencing. *American journal of human genetics* 90: 599-613 10.1016/j.ajhg.2012.02.013
- 3 Langmead B, Trapnell C, Pop M, Salzberg SL (2009) Ultrafast and memory-efficient alignment of short DNA sequences to the human genome. *Genome Biol* 10: R25 10.1186/gb-2009-10-3-r25
- 4 Ramasamy A, Trabzuni D, Guelfi S, Varghese V, Smith C, Walker R et al (2014) Genetic variability in the regulation of gene expression in ten regions of the human brain. *Nat Neurosci* 17: 1418-1428 10.1038/nn.3801
- 5 Trapnell C, Pachter L, Salzberg SL (2009) TopHat: discovering splice junctions with RNA-Seq. *Bioinformatics* 25: 1105-1111 10.1093/bioinformatics/btp120
- 6 Zhang B, Gaiteri C, Bodea LG, Wang Z, McElwee J, Podtelezhnikov AA et al (2013) Integrated systems approach identifies genetic nodes and networks in late-onset Alzheimer's disease. *Cell* 153: 707-720 10.1016/j.cell.2013.03.030
- 7 Zou F, Chai HS, Younkin CS, Allen M, Crook J, Pankratz VS et al (2012) Brain expression genome-wide association study (eGWAS) identifies human disease-associated variants. *PLoS Genet* 8: e1002707 10.1371/journal.pgen.1002707
