# Supplementary material
Source: PubMed Central journal article supplement (PMC4947429)

**a****Histogram for RIN, Cohort A**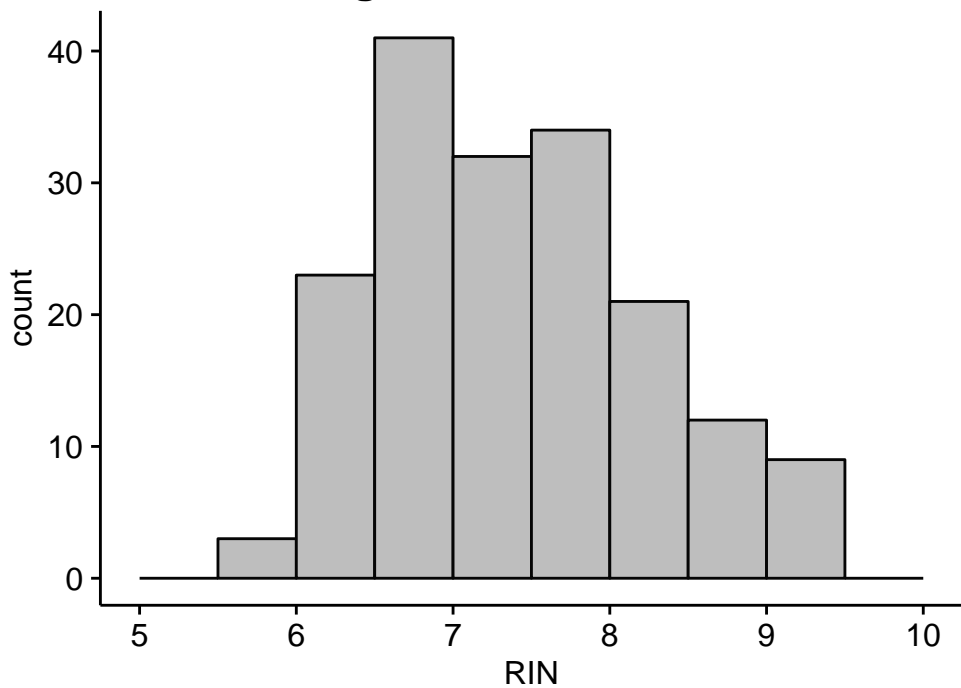**b****Histogram for RIN, Cohort B**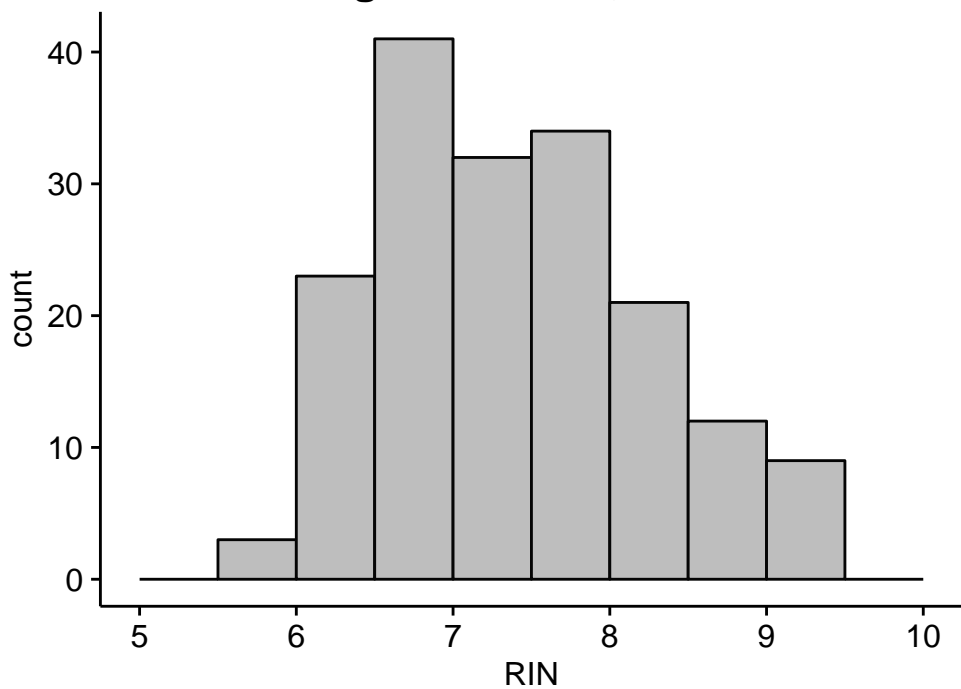

Supplement: NIHMS792973-supplement-401_2016_1576_MOESM2_ESM.pdf [file NIHMS792973-supplement-401_2016_1576_MOESM2_ESM.pdf]

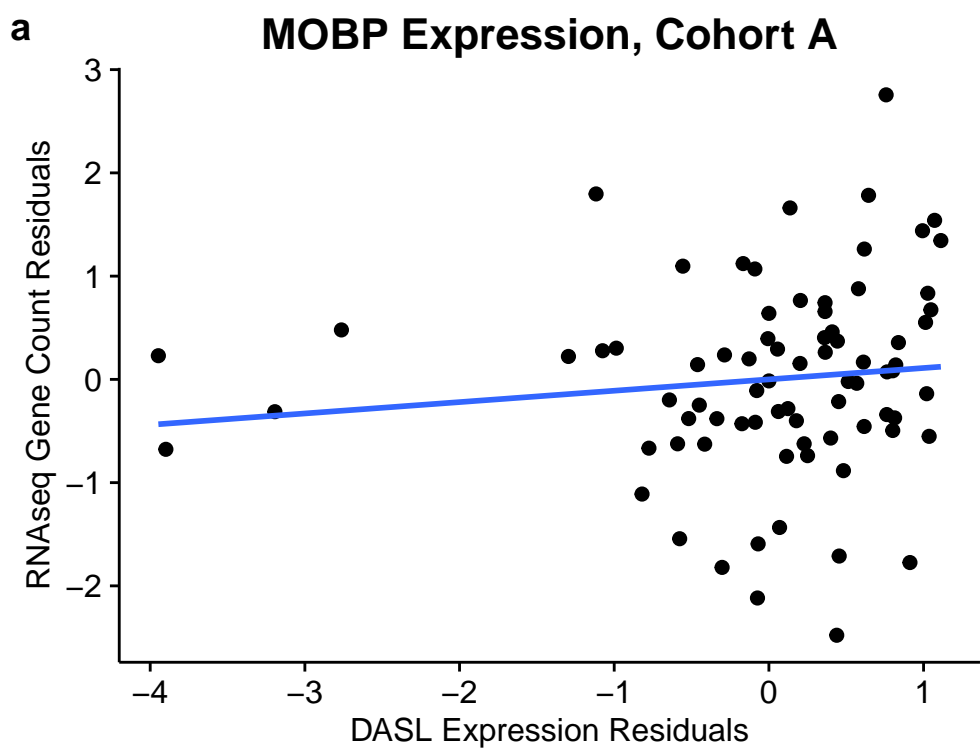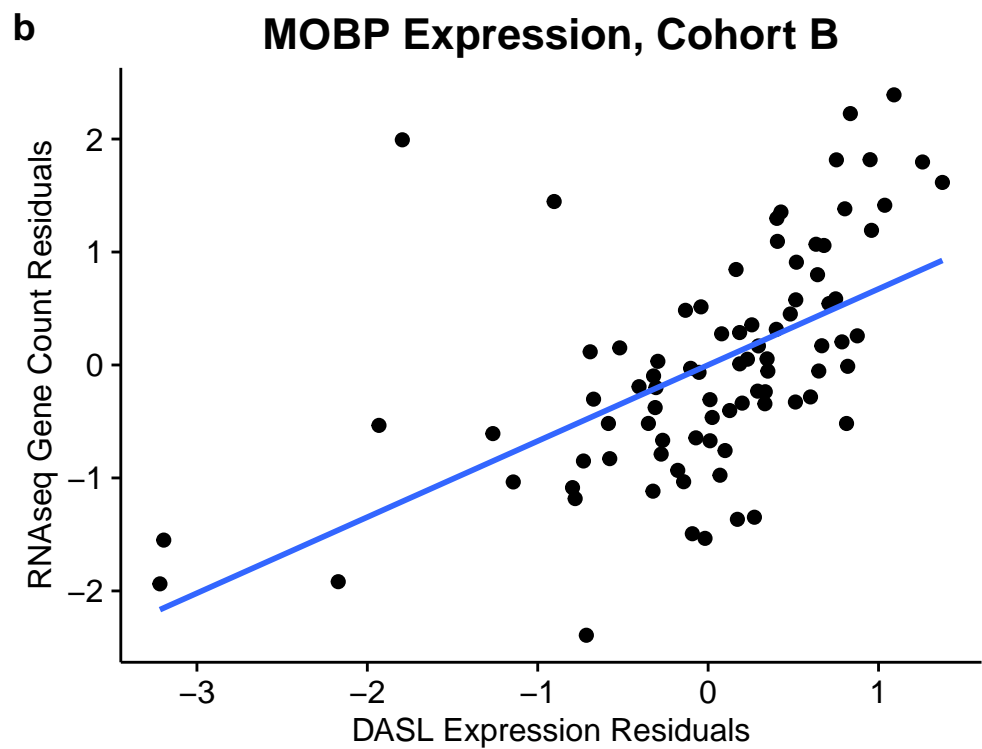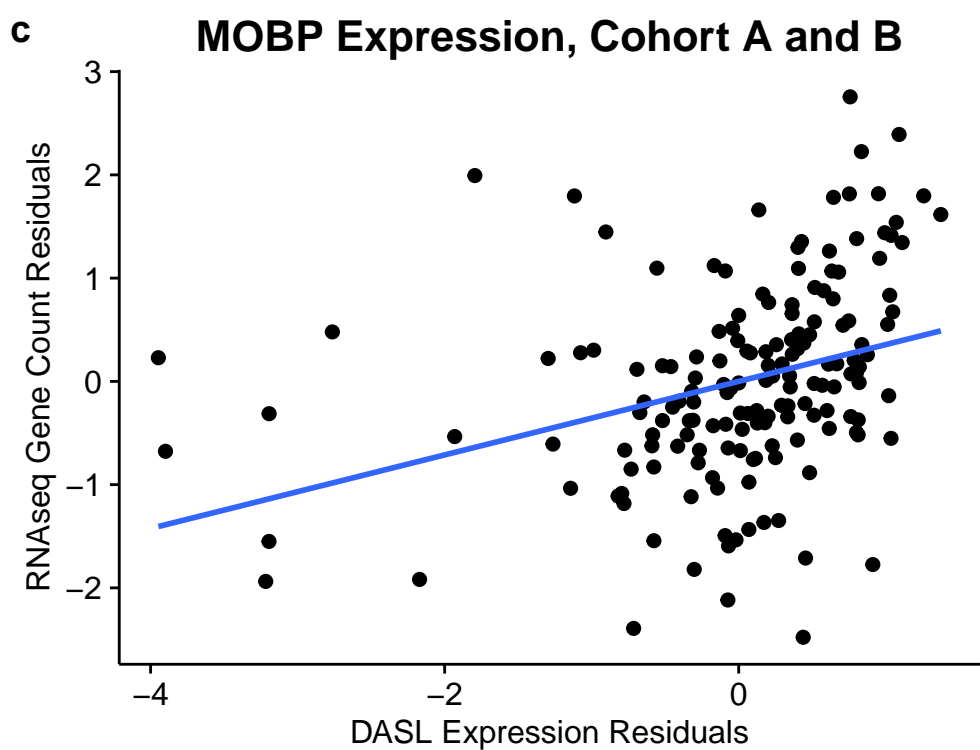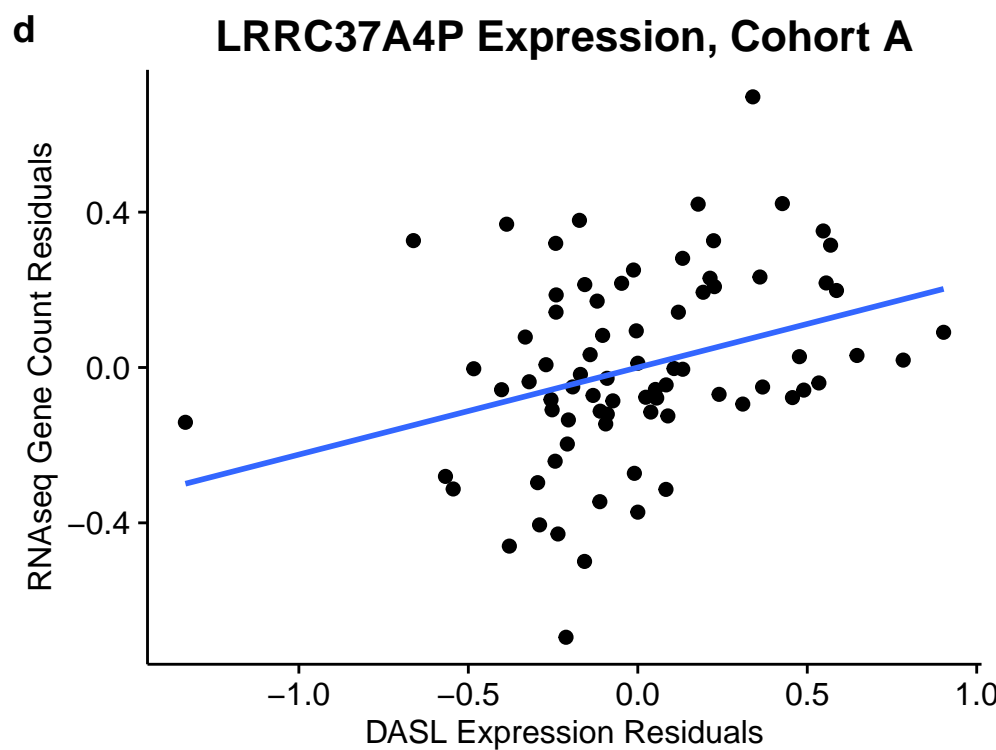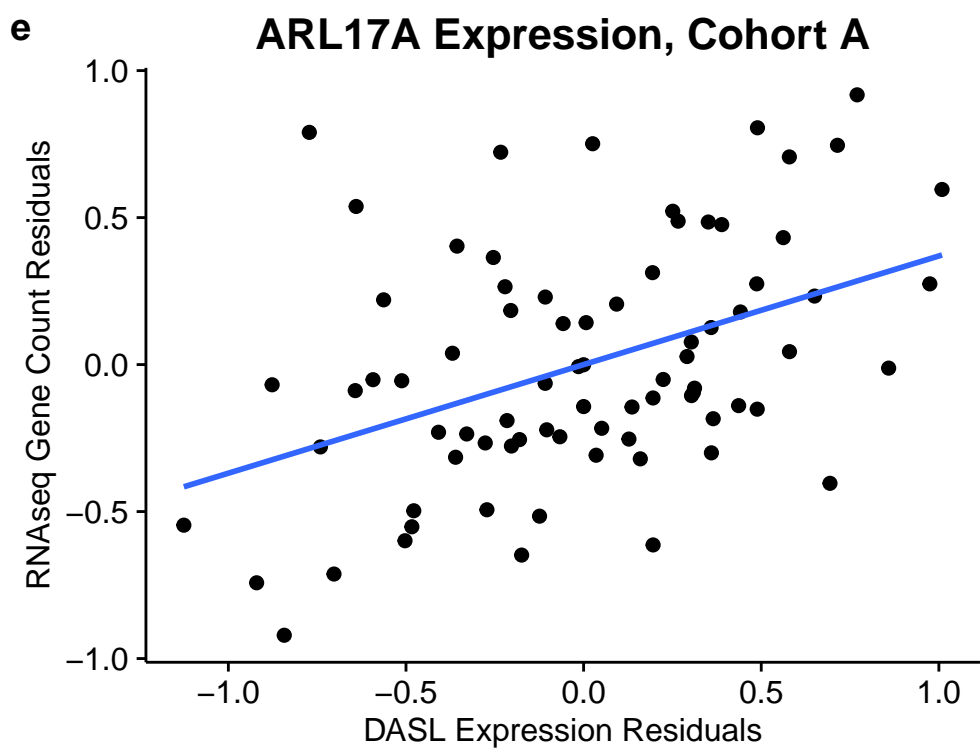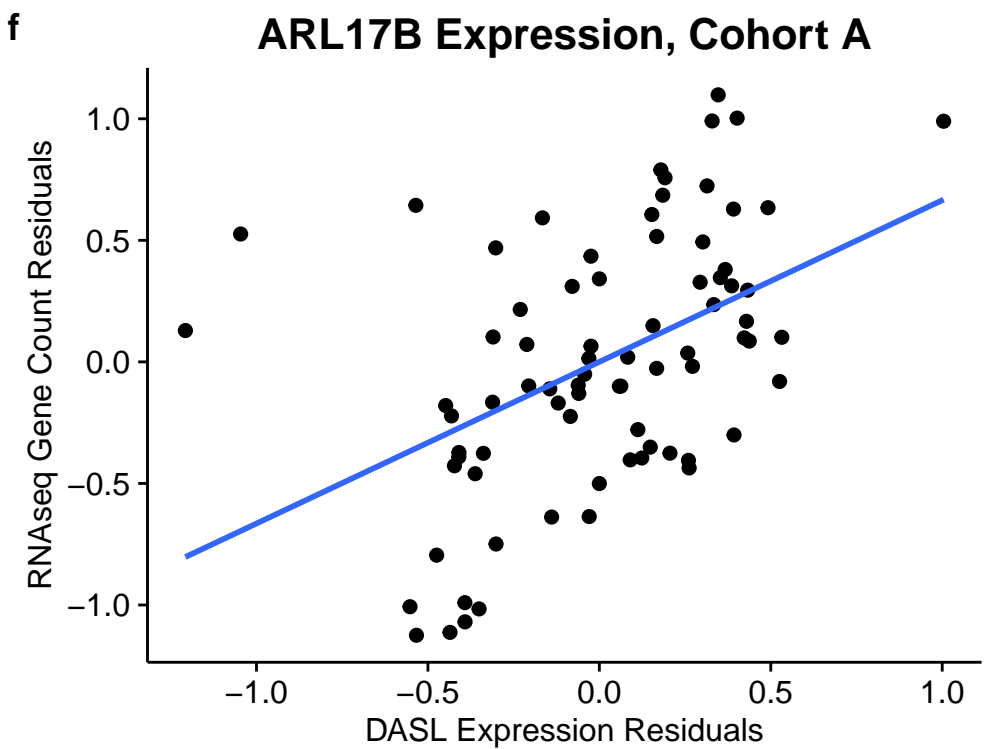

Supplement: NIHMS792973-supplement-401_2016_1576_MOESM3_ESM.pdf [file NIHMS792973-supplement-401_2016_1576_MOESM3_ESM.pdf]
